# Supplementary material for: Plant-derived chimeric antibodies inhibit the invasion of human fibroblasts by Toxoplasma gondii
Source: PeerJ. 2018 Dec 11;6:e5780. doi: 10.7717/peerj.5780 (PMC6294049; doi:10.7717/peerj.5780)
Supplement: Supplemental Information 1 [file peerj-06-5780-s001.docx]

**Plant-derived chimeric antibodies inhibit the invasion of human fibroblasts by *Toxoplasma gondii***

Sherene Swee Yin Lim1, Kek Heng Chua2, Greta Nölke3, Holger Spiegel3, Wai Leong Goh4, Sek Chuen Chow4, Boon Pin Kee2, Rainer Fischer3, Stefan Schillberg3 & Rofina Yasmin Othman1,5

1Institute of Biological Sciences, University of Malaya, 50603 Kuala Lumpur, Malaysia.

2Department of Biomedical Science, Faculty of Medicine, University of Malaya, 50603 Kuala Lumpur, Malaysia.

3Fraunhofer Institute for Molecular Biology and Applied Ecology IME, Forckenbeckstraße 6, 52074 Aachen, Germany.

4School of Science, Monash University Malaysia, Jalan Lagoon Selatan, 47500 Bandar Sunway, Selangor Darul Ehsan, Malaysia.

5Centre for Research in Biotechnology for Agriculture, University of Malaya 50603, Kuala Lumpur.

Corresponding author:

Rofina Yasmin Othman

Mailing address: Institute of Biological Sciences, University of Malaya, 50603 Kuala Lumpur, Malaysia.

E-mail address: [yasmin@um.edu.my](mailto:yasmin@um.edu.my)

These authors contributed equally to this work.

**Supplementary Table S1: Primer sequences for VH and VL regions amplification.** Primer sequences targeting conserved V regions amplifications, with Sfi1 and Not1 restriction sites underlined and volume of each primer in the primer set mixes indicated.

| **Primer** | Sequence | **Volume (μl)** |
| --- | --- | --- |
| Vκ 5’ / sense (*Sfi* 1) |  |  |
| MSCVK-1 | GGG CCC AGC CGG CCG AGC TCG AYA TCC AGC TGA CTC AGA C | 1 |
| MSCVK-2 | GGG CCC AGC CGG CCG AGC TCG AYA TTG TTC TCW CCC AGT C | 2 |
| MSCVK-3 | GGG CCC AGC CGG CCG AGC TCG AYA TTG TGM TMA CTC AGT C | 5 |
| MSCVK-4 | GGG CCC AGC CGG CCG AGC TCG AYA TTG TGY TRA CAC AGT C | 3.5 |
| MSCVK-5 | GGG CCC AGC CGG CCG AGC TCG AYA TTG TRA TGA CMC AGT C | 4 |
| MSCVK-6 | GGG CCC AGC CGG CCG AGC TCG AYA TTM AGA TRA MCC AGT C | 7 |
| MSCVK-7 | GGG CCC AGC CGG CCG AGC TCG AYA TTC AGA TGA YDC AGT C | 6 |
| MSCVK-8 | GGG CCC AGC CGG CCG AGC TCG AYA TYC AGA TGA CAC AGA C | 1.5 |
| MSCVK-9 | GGG CCC AGC CGG CCG AGC TCG AYA TTG TTC TCA WCC AGT C | 2 |
| MSCVK-10 | GGG CCC AGC CGG CCG AGC TCG AYA TTG WGC TSA CCC AAT C | 3.5 |
| MSCVK-11 | GGG CCC AGC CGG CCG AGC TCG AYA TTS TRA TGA CCC ART C | 8 |
| MSCVK-12 | GGG CCC AGC CGG CCG AGC TCG AYR TTK TGA TGA CCC ARA C | 8 |
| MSCVK-13 | GGG CCC AGC CGG CCG AGC TCG AYA TTG TGA TGA CBC AGK C | 6 |
| MSCVK-14 | GGG CCC AGC CGG CCG AGC TCG AYA TTG TGA TAA CYC AGG A | 2 |
| MSCVK-15 | GGG CCC AGC CGG CCG AGC TCG AYA TTG TGA TGA CCC AGW T | 2 |
| MSCVK-16 | GGG CCC AGC CGG CCG AGC TCG AYA TTG TGA TGA CAC AAC C | 1 |
| MSCVK-17 | GGG CCC AGC CGG CCG AGC TCG AYA TTT TGC TGA CTC AGT C | 1 |
|  |  |  |
| Vκ 3’ / antisense |  |  |
| MSCJK12-B | GGA AGA TCT AGA GGA ACC ACC TTT KAT TTC CAG YTT GGT CCC | 2 |
| MSCJK4-B | GGA AGA TCT AGA GGA ACC ACC TTT TAT TTC CAA CTT TGT CCC | 1 |
| MSCJK5-B | GGA AGA TCT AGA GGA ACC ACC TTT CAG CTC CAG CTT GGT CCC | 1 |
|  |  |  |
| Vλ 5’/ sense (*Sfi* 1) |  |  |
| MSCVL-1 | GGG CCC AGC CGG CCG AGC TCG ATG CTG TTG TGA CTC AGG AAT C | 1 |
|  |  |  |

**Supplementary Table S1: (continuous).**

| Vλ 3’/ antisense-short linker |  |  |
| --- | --- | --- |
| MSCJKL-B | GGA AGA TCT AGA GGA ACC ACC GCC TAG GAC AGT CAG TTT GG | 1 |
|  |  |  |
| VH 5’ / sense |  |  |
| MSCVH1 | GGT GGT TCC TCT AGA TCT TCC CTC GAG GTR MAG CTT CAG GAG TC | 4 |
| MSCVH2 | GGT GGT TCC TCT AGA TCT TCC CTC GAG GTB CAG CTB CAG CAG TC | 4 |
| MSCVH3 | GGT GGT TCC TCT AGA TCT TCC CTC GAG GTG CAG CTG AAG SAS TC | 3 |
| MSCVH4 | GGT GGT TCC TCT AGA TCT TCC CTC GAG GTC CAR CTG CAA CAR TC | 4 |
| MSCVH5 | GGT GGT TCC TCT AGA TCT TCC CTC GAG GTY CAG CTB CAG CAR TC | 7 |
| MSCVH6 | GGT GGT TCC TCT AGA TCT TCC CTC GAG GTY CAR CTG CAG CAG TC | 2 |
| MSCVH7 | GGT GGT TCC TCT AGA TCT TCC CTC GAG GTC CAC GTG AAG CAG TC | 1 |
| MSCVH8 | GGT GGT TCC TCT AGA TCT TCC CTC GAG GTG AAS STG GTG GAA TC | 2 |
| MSCVH9 | GGT GGT TCC TCT AGA TCT TCC CTC GAG GTG AWG YTG GTG GAG TC | 5 |
| MSCVH10 | GGT GGT TCC TCT AGA TCT TCC CTC GAG GTG CAG SKG GTG GAG TC | 2 |
| MSCVH11 | GGT GGT TCC TCT AGA TCT TCC CTC GAG GTG CAM CTG GTG GAG TC | 2 |
| MSCVH12 | GGT GGT TCC TCT AGA TCT TCC CTC GAG GTG AAG CTG ATG GAR TC | 2 |
| MSCVH13 | GGT GGT TCC TCT AGA TCT TCC CTC GAG GTG CAR CTT GTT GAG TC | 1 |
| MSCVH14 | GGT GGT TCC TCT AGA TCT TCC CTC GAG GTR AAG CTT CTC GAG TC | 2 |
| MSCVH15 | GGT GGT TCC TCT AGA TCT TCC CTC GAG GTG AAR STT GAG GAG TC | 2 |
| MSCVH16 | GGT GGT TCC TCT AGA TCT TCC CTC GAG GTT ACT CTR AAA GWG TST G | 5 |
| MSCVH17 | GGT GGT TCC TCT AGA TCT TCC CTC GAG GTC CAA CTV CAG CAR CC | 3.5 |
| MSCVH18 | GGT GGT TCC TCT AGA TCT TCC CTC GAG GTG AAG TTG GAA GTG TC | 0.7 |
| MSCVH19 | GGT GGT TCC TCT AGA TCT TCC CTC GAG GTG AAG GTG ATC GAG TC | 0.7 |
|  |  |  |
| VH 3’ / antisense (*Not*1) |  |  |
| MSCG1ab-B | CCT GCG GCC GCC CAC TAG TGA CAG ATG GGG STG TYG TTT TGG | 3 |
| MSCG3-B | CCT GCG GCC GCC CAC TAG TGA CAG ATG GGG CTG TTG TTG T | 1 |
|  |  |  |
| MSC-F | GCG GGG CCC AGC CGG CCG AGC TCG | 1 |
| RSC-B | GCC TGC GGC CGC ACT AGT GAC AGA | 1 |

**Supplementary Table S2: Anti-*T. gondii* scFv IGHV and IGKV subgroup usage and H / κL-CDR3 motifs.** Candidate scFv clones binding to *T. gondii* were analysed to determine its CDRs and origin of murine germline V-regions using the online V-Quest software provided by the International ImMunoGeneTics data base (IMGT, imgt.cines.fr/textes/vquest/).

| **Clone ID** | **IGHV** | **H chain CDR3** | **H chain CDR3 length (bp)** | **IMGT - H [CDR1.CDR2.CDR3] length** | **GenBank accession no.** | **IGKV** | **L chain CDR3** | **L chain CDR3 length (bp)** | **IMGT - L [CDR1.CDR2.CDR3] length** | **GenBank accession no.** |
| --- | --- | --- | --- | --- | --- | --- | --- | --- | --- | --- |
| **TG64** | 1-4*01 | CAREAWFAYW | 8 | [8.8.8] | AC073561 | 4-70*01 | CHQRSSYPYTF | 9 | [5.3.9] | AJ235943 |
| **TG69** | 14-3*02 | CARLPYW | 5 | [8.8.5] | AJ851868 | 6-23*01 | CQQYSSYHTF | 8 | [6.3.8] | AJ235961 |
| **TG116** | 14-3*02 | CASSHGYEDYFDYW | 12 | [8.8.12] | AJ851868 | 6-13*01 | CQQYSSYPYTF | 9 | [6.3.9] | J00569 |
| **TG130** | 1S29*02 | CARGDGFAYW | 8 | [8.8.8] | J0048 | 6-17*01 | CQQYNSYPYTF | 9 | [6.3.9] | Y15978 |

**Supplementary Table** **S3:** **Results of SAROTUP (TUPScan) (**[**http://immunet.cn/sarotup/**](http://immunet.cn/sarotup/)**) analysis of scFv regions containing target-unrelated peptide (TUP) motif.**

| **ScFv, target-unrelated peptides** | **Matched pattern** | **Brief description** |
| --- | --- | --- |
| TG64 (VL CDR1) MTQSPAILSASPGEKVTMTCRASSSISYMHWYQQKPGTS | S-S-[IL] | Confirmed or suspected binder to immunoglobulin Fc Region. |
| TG64 (VH CDR3) STAYMQLSSLTSEDSAVYYCAREAWFAYWGQGTLVTVSA | S-S-[IL] | Confirmed or suspected binder to immunoglobulin Fc Region. |
| TG69 (VH CDR3) DTSSNTAYLQLSSLTSEDTAVYYCARLPYWGQGTTLTVSS | S-S-[IL] | Confirmed or suspected binder to immunoglobulin Fc Region. |
| TG116 (VH CDR3) YLQLSSLTSEDTAVYYCASSHGYEDYFDYWGQGTTLTVSS | S-S-[IL] | Confirmed or suspected binder to immunoglobulin Fc Region. |

**Supplementary Table S4: Frequency of nucleotides mutated at randomized positions using semi-degenerate primers.** Percentage of each nucleotide residues found at the 4 mutated positions was calculated from a random selection of 20 clones, showing an almost even distribution in nucleotide usage.

|  | **Degenerate code[[1]](#footnote-1)** | **Frequency percentage (%)[[2]](#footnote-2)** | | | |
| --- | --- | --- | --- | --- | --- |
| **A** | **C** | **G** | **T** |
| 1st nucleotide | V | 30.0 | 45.0 | 25.0 | - |
| 2nd nucleotide | N | 25.0 | 30.0 | 20.0 | 25.0 |
| 3rd nucleotide | S | - | 45.0 | 55.0 | - |
| 4th nucleotide | N | 25.0 | 30.0 | 20.0 | 25.0 |

V = A or C or G; S = C or G; N = A or C or G or T.

2 Frequency calculated based on number of residues occurring in 20 sequence

1. [↑](#footnote-ref-1)
2. [↑](#footnote-ref-2)
