# Supplementary material for: Plant-derived chimeric antibodies inhibit the invasion of human fibroblasts by Toxoplasma gondii
Source: PeerJ. 2018 Dec 11;6:e5780. doi: 10.7717/peerj.5780 (PMC6294049; doi:10.7717/peerj.5780)
Supplement: Supplemental Information 2 [file peerj-06-5780-s002.docx]

**Plant-derived chimeric antibodies inhibit the invasion of human fibroblasts by *Toxoplasma gondii***

Sherene Swee Yin Lim1, Kek Heng Chua2, Greta Nölke3, Holger Spiegel3, Wai Leong Goh4, Sek Chuen Chow4, Boon Pin Kee2, Rainer Fischer3, Stefan Schillberg3 & Rofina Yasmin Othman1,5

1Institute of Biological Sciences, University of Malaya, Kuala Lumpur, Malaysia. 2Department of Biomedical Science, Faculty of Medicine, University of Malaya, Kuala Lumpur, Malaysia.

3Fraunhofer Institute for Molecular Biology and Applied Ecology IME, Aachen, Germany.

4School of Science, Monash University Malaysia, Bandar Sunway, Selangor, Malaysia.

5Centre for Research in Biotechnology for Agriculture, University of Malaya, Kuala Lumpur, Malaysia.

Corresponding author:

Rofina Yasmin Othman

Mailing address: Institute of Biological Sciences, University of Malaya, 50603 Kuala Lumpur, Malaysia.

E-mail address: [yasmin@um.edu.my](mailto:yasmin@um.edu.my)

These authors contributed equally to this work.


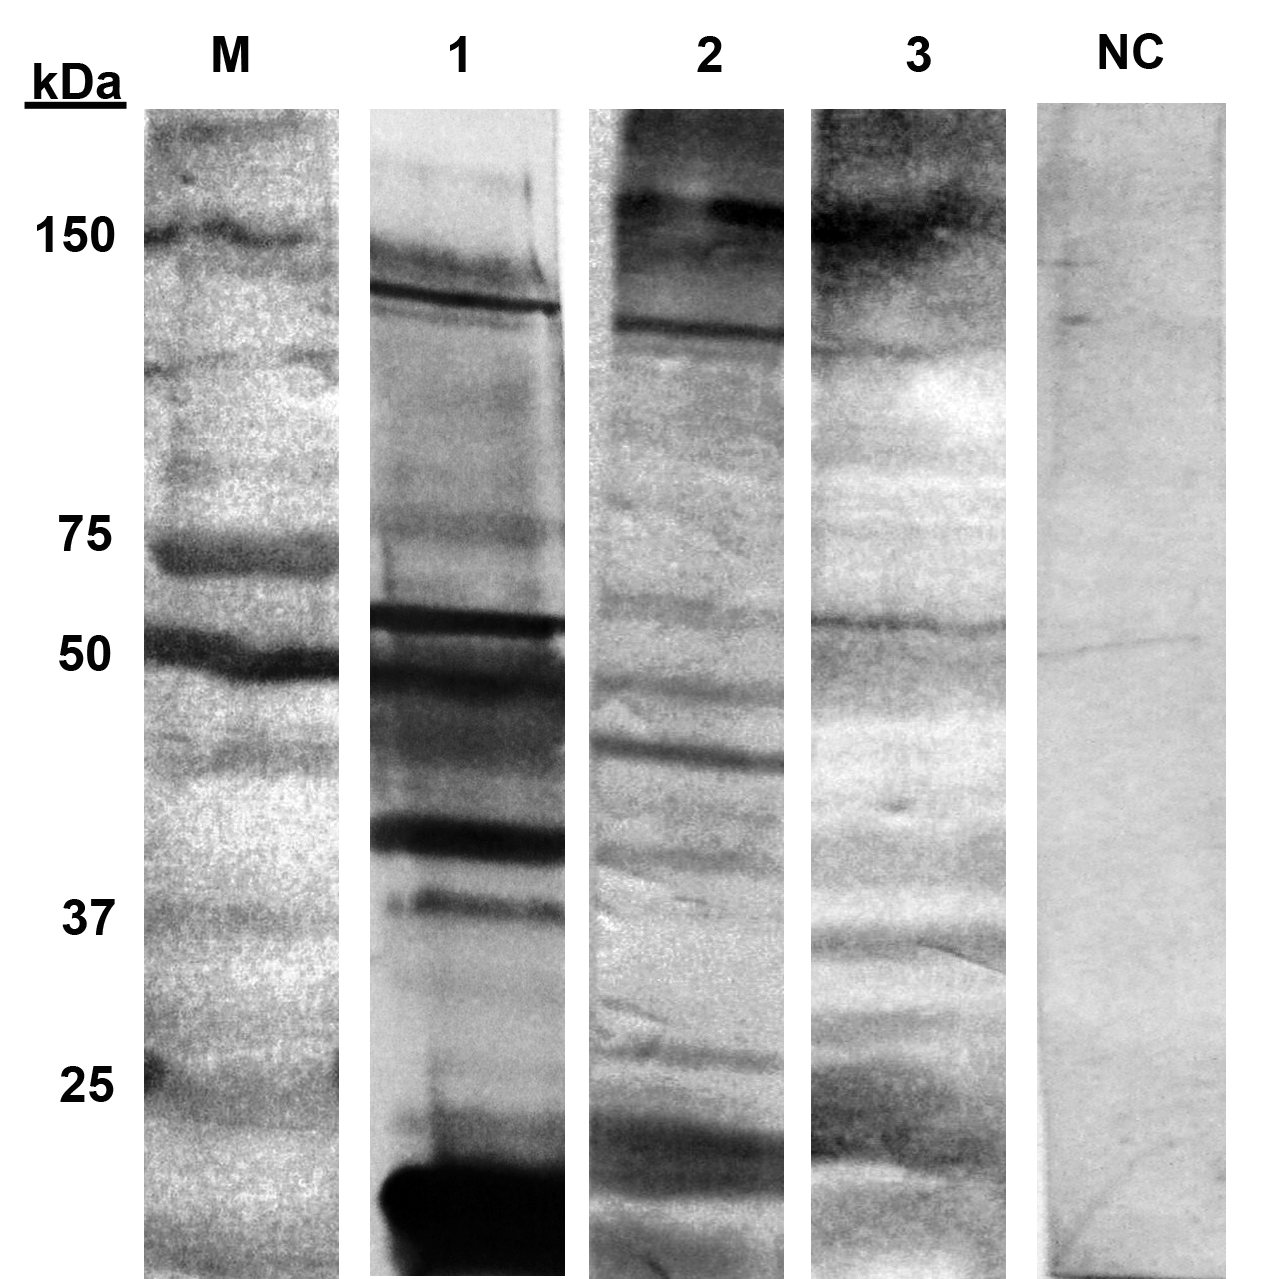


**Supplementary Figure S1: Immunoblot verification of mouse serum immunized against *T. gondii*.** Western blot strips of *T. gondii* parasite separated on SDS-PAGE were probed

with immunized mouse serum individually. The immune mice serum (lanes 1 – 3)

showed IgG reactivity with the parasite antigens. Uninfected mouse serum was used as

negative control (lane NC). The migration of size markers is indicated in kilodaltons

(Prestained protein ladder, Fermentas, SM0671).


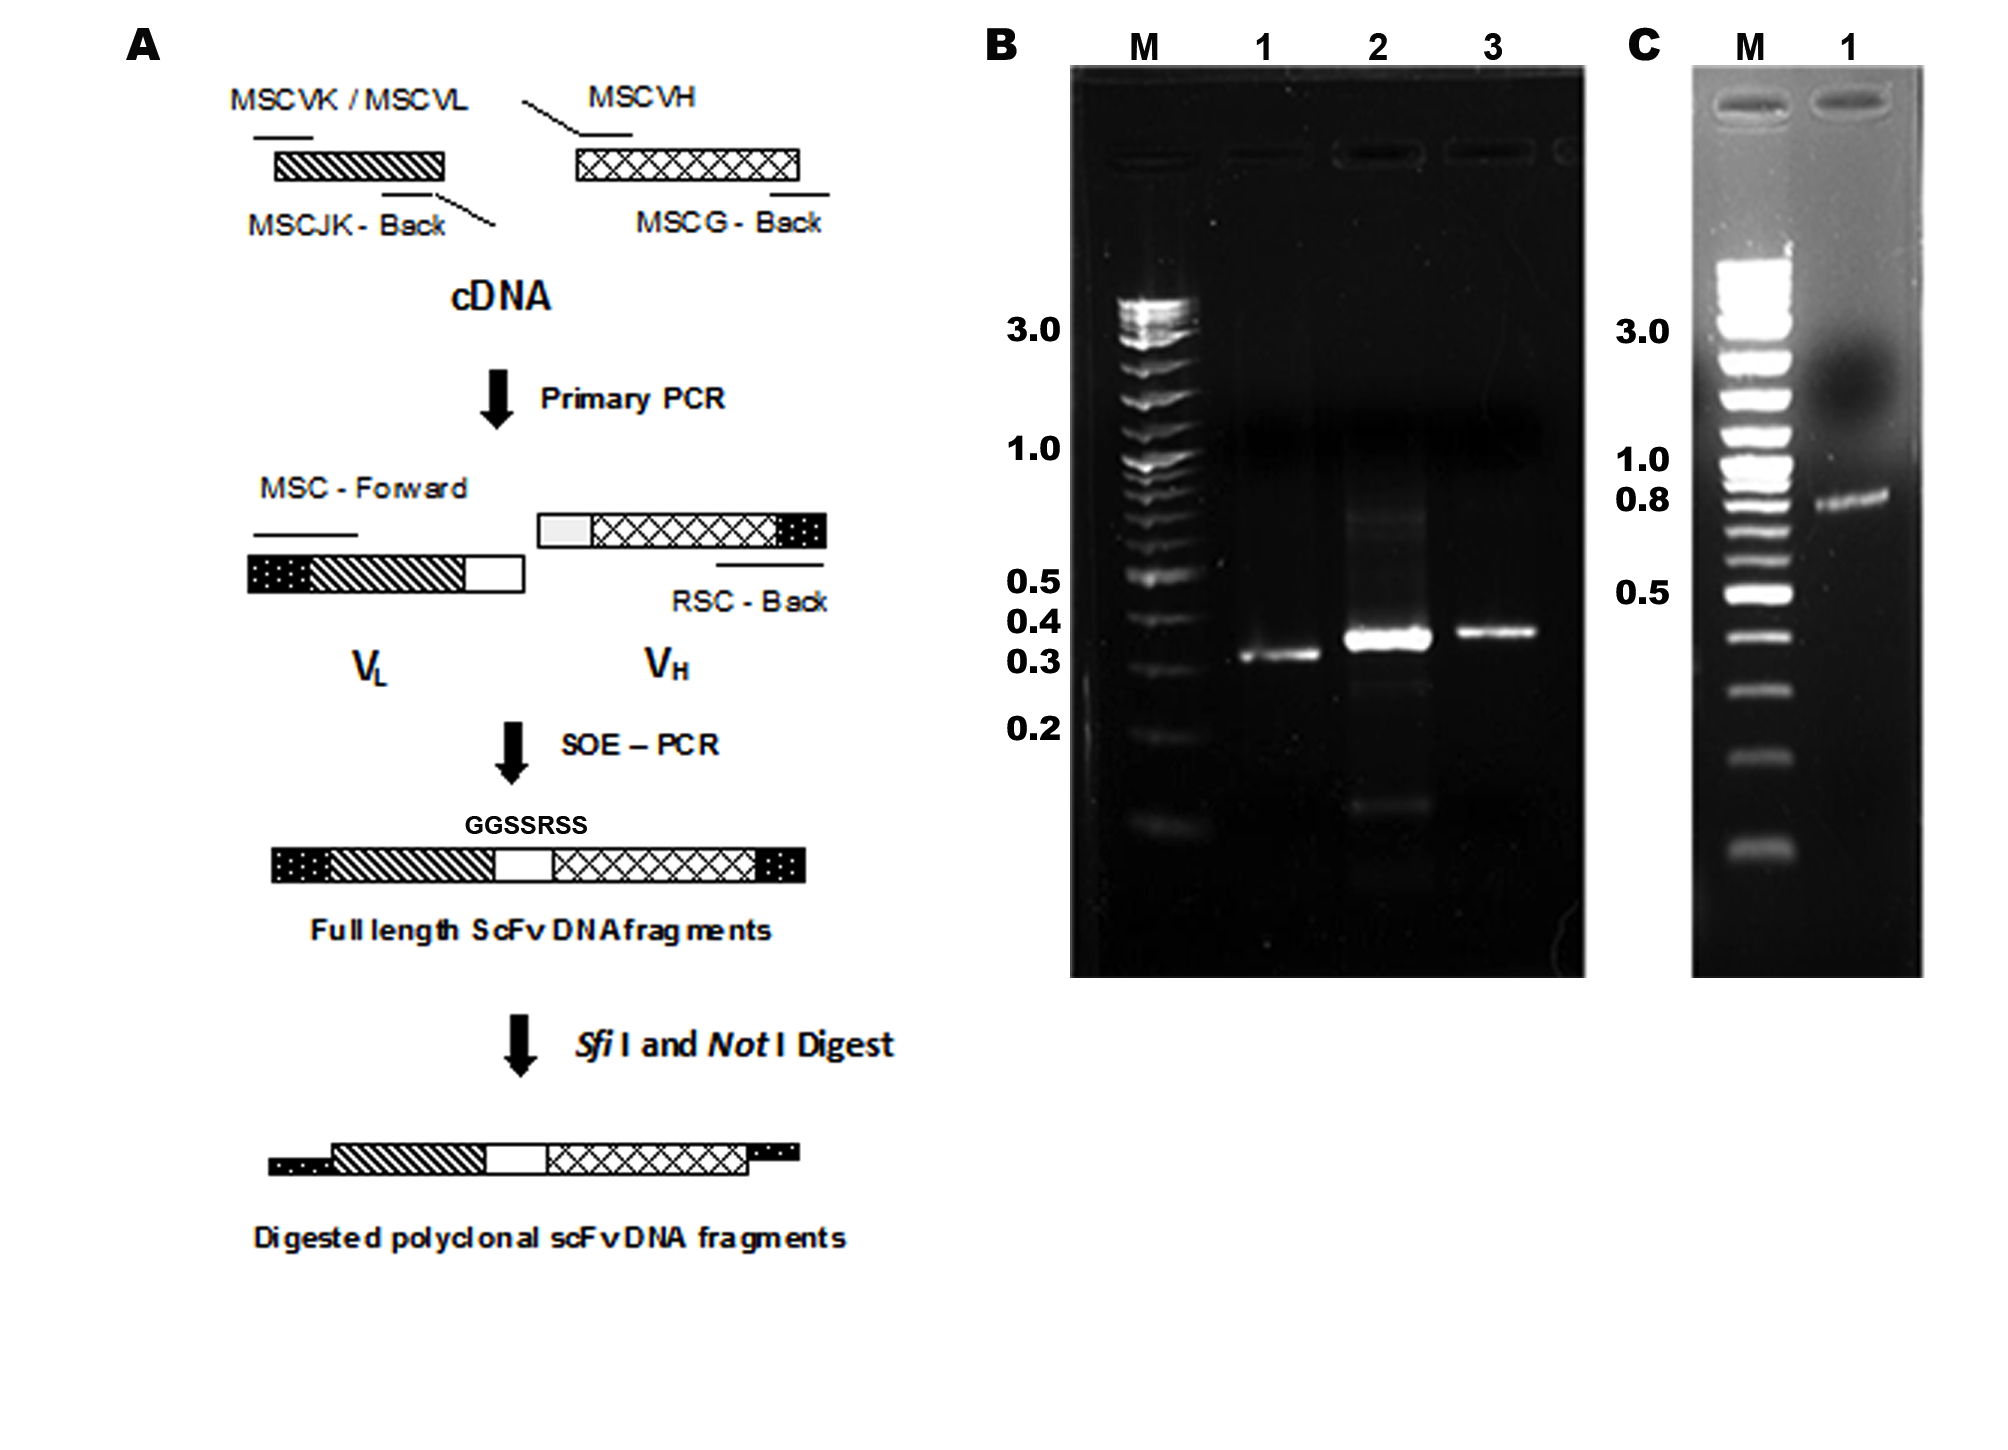


**Supplementary Figure S2: PCR assembly of scFv antibodies. (A)** Strategy of scFv fragment assembly. A short peptide linker (GGSSRSS) was fused between the VH and VL chains and assembled into scFv fragments by splice overlap extension PCR (SOE-PCR). Restriction sites for both *Sfi*I and *Not*I are incorporated at both ends of the scFv for subcloning into the pCANTAB5E vector. **(B and C)** Primary PCR amplification of V-region genes and scFv assembly. B, Amplified VH and VL fragments. Lane 1, VL fragment; lane 2, VH fragment; lane 3, VH size-marker (GE Life Sciences). C, lane 1, Fully-assembled scFv antibody fragment at the expected size of 800 bp. The DNA size marker is indicated on the left in kbp.

**Supplementary Figure S3: Chromatograms of truncated scFv sequences – scFv 18 (Stop**

**codon is indicated in red box).**

**Supplementary Figure S4: Chromatograms of truncated scFv sequences – scFv 48 (Stop**

**codon is indicated in red box).**

**Supplementary Figure S5: Chromatograms of truncated scFv sequences – scFv 103 (Stop codon is indicated in red box).**

**Supplementary Figure S6: Chromatograms of truncated scFv sequences – scFv 109 (Stop codon is indicated in red box).**

**Supplementary Figure S7: Chromatograms of truncated scFv sequences – scFv 118 (Stop codon is indicated in red box).**


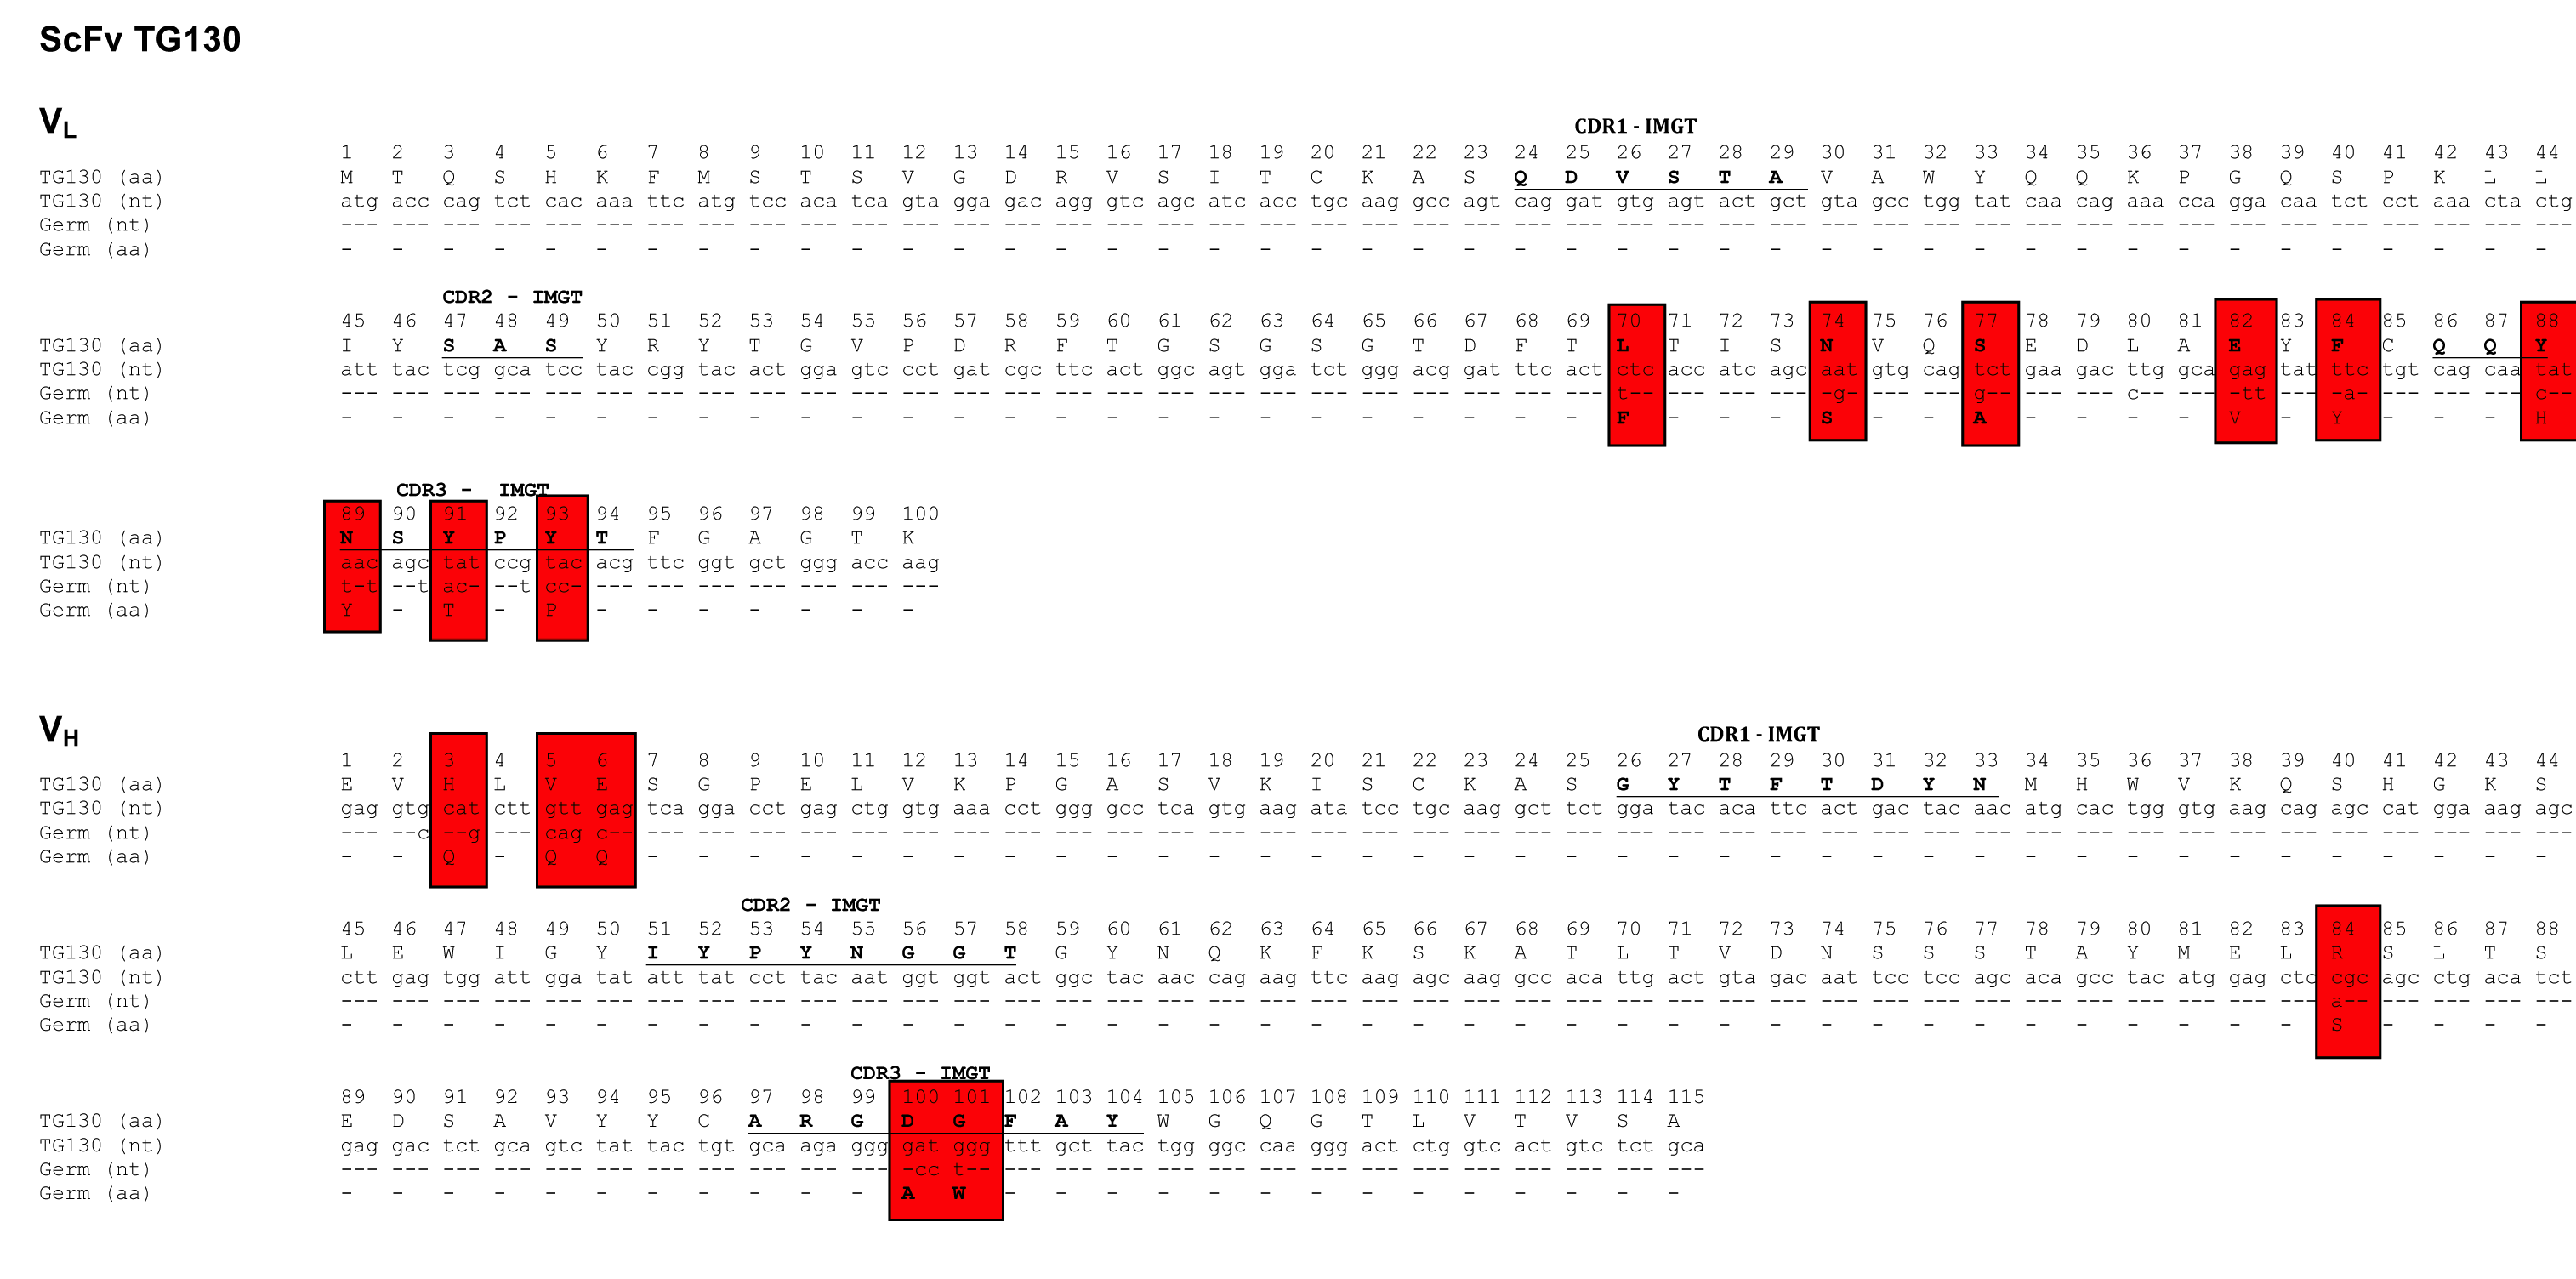


**Supplementary Figure S8: Germline sequence homology alignment with biopanning-selected scFv nucleotide and amino acid sequences.**


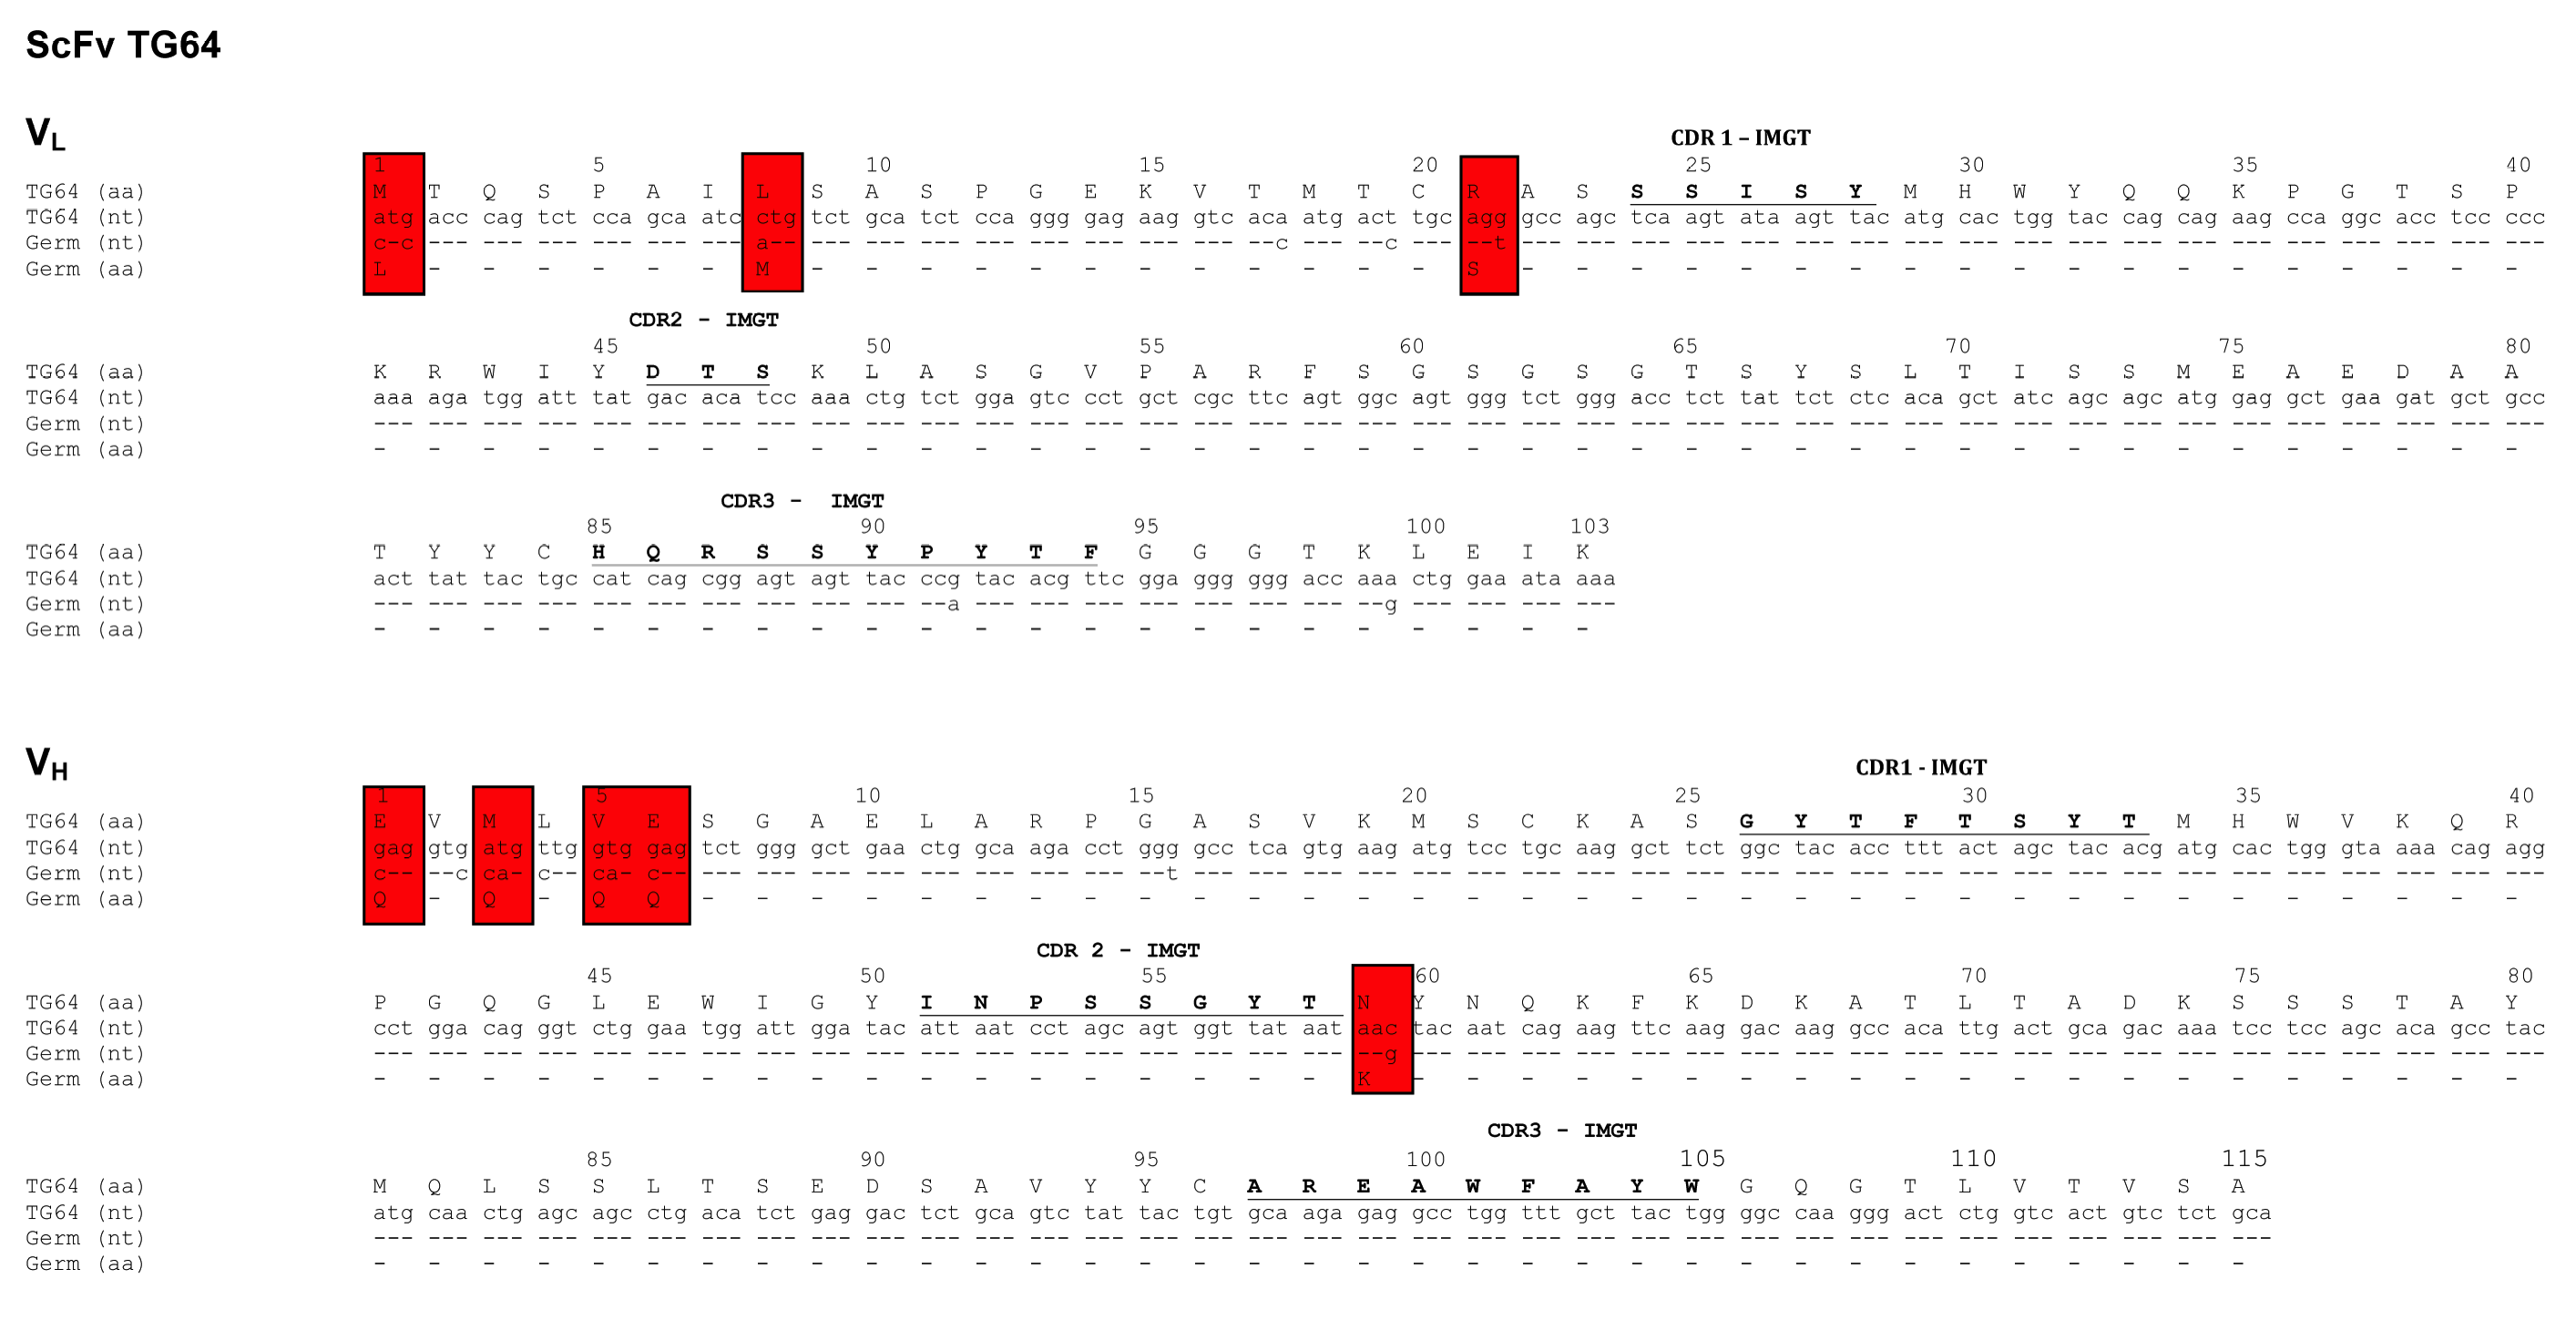


**Supplementary Figure S8: (continuous).**


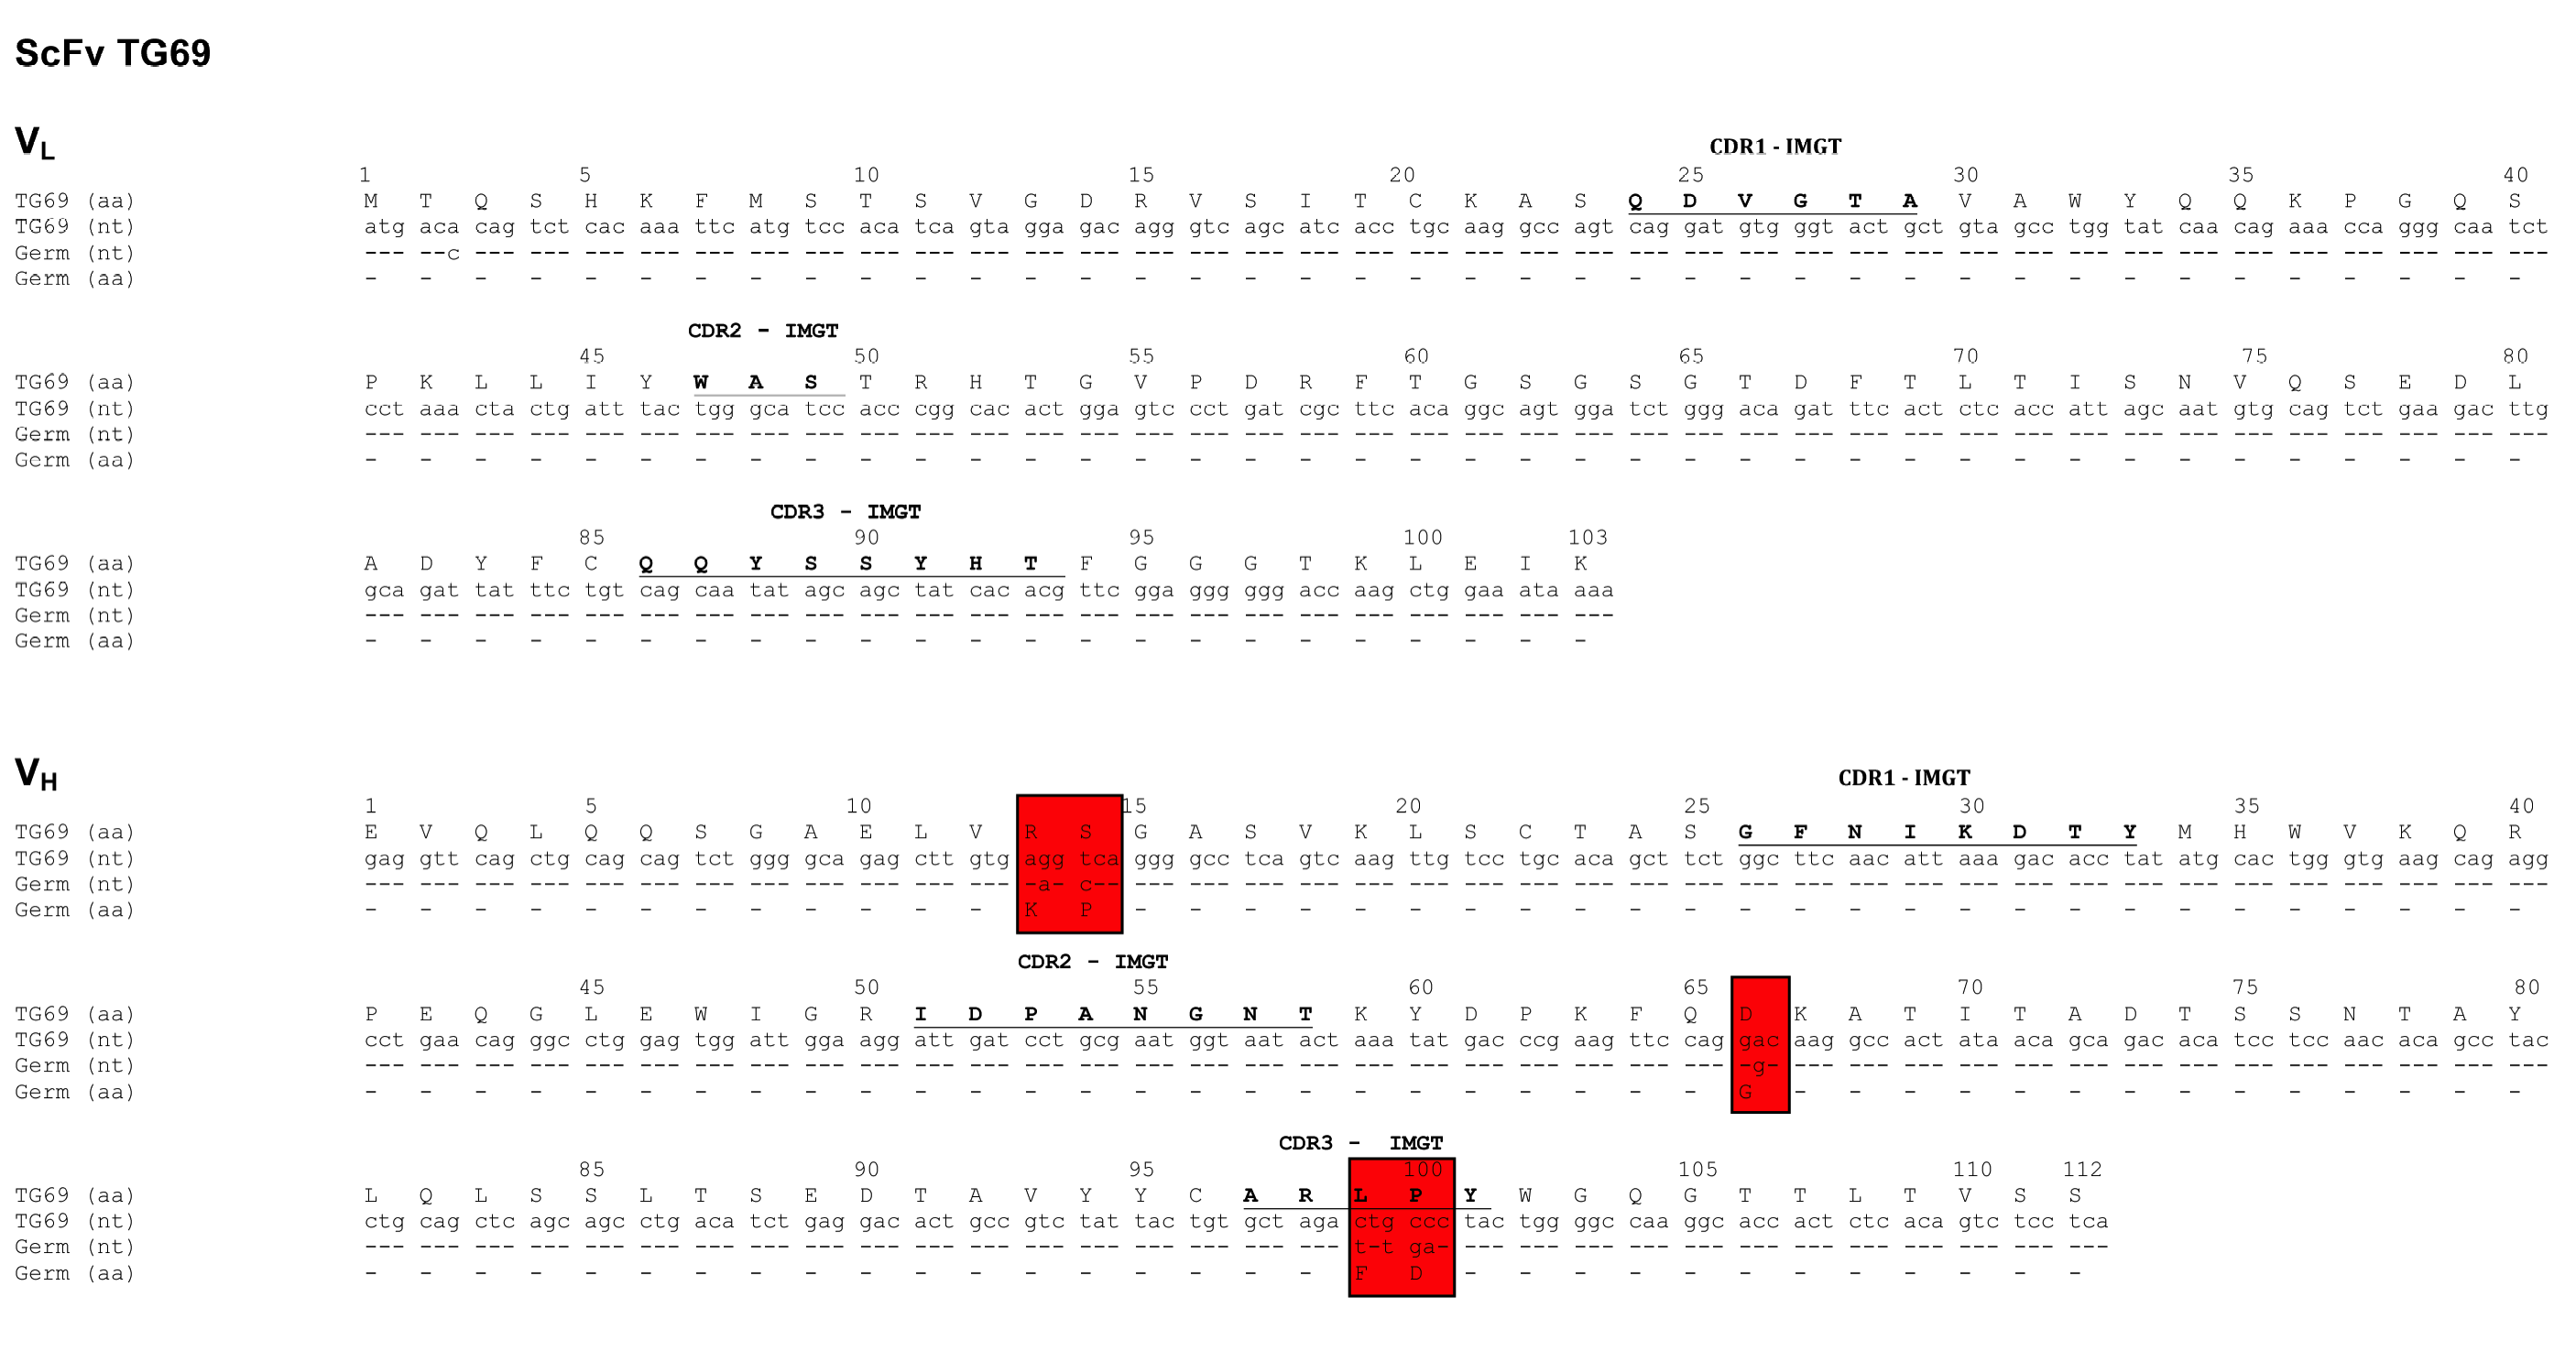


**Supplementary Figure S8: (continuous).**


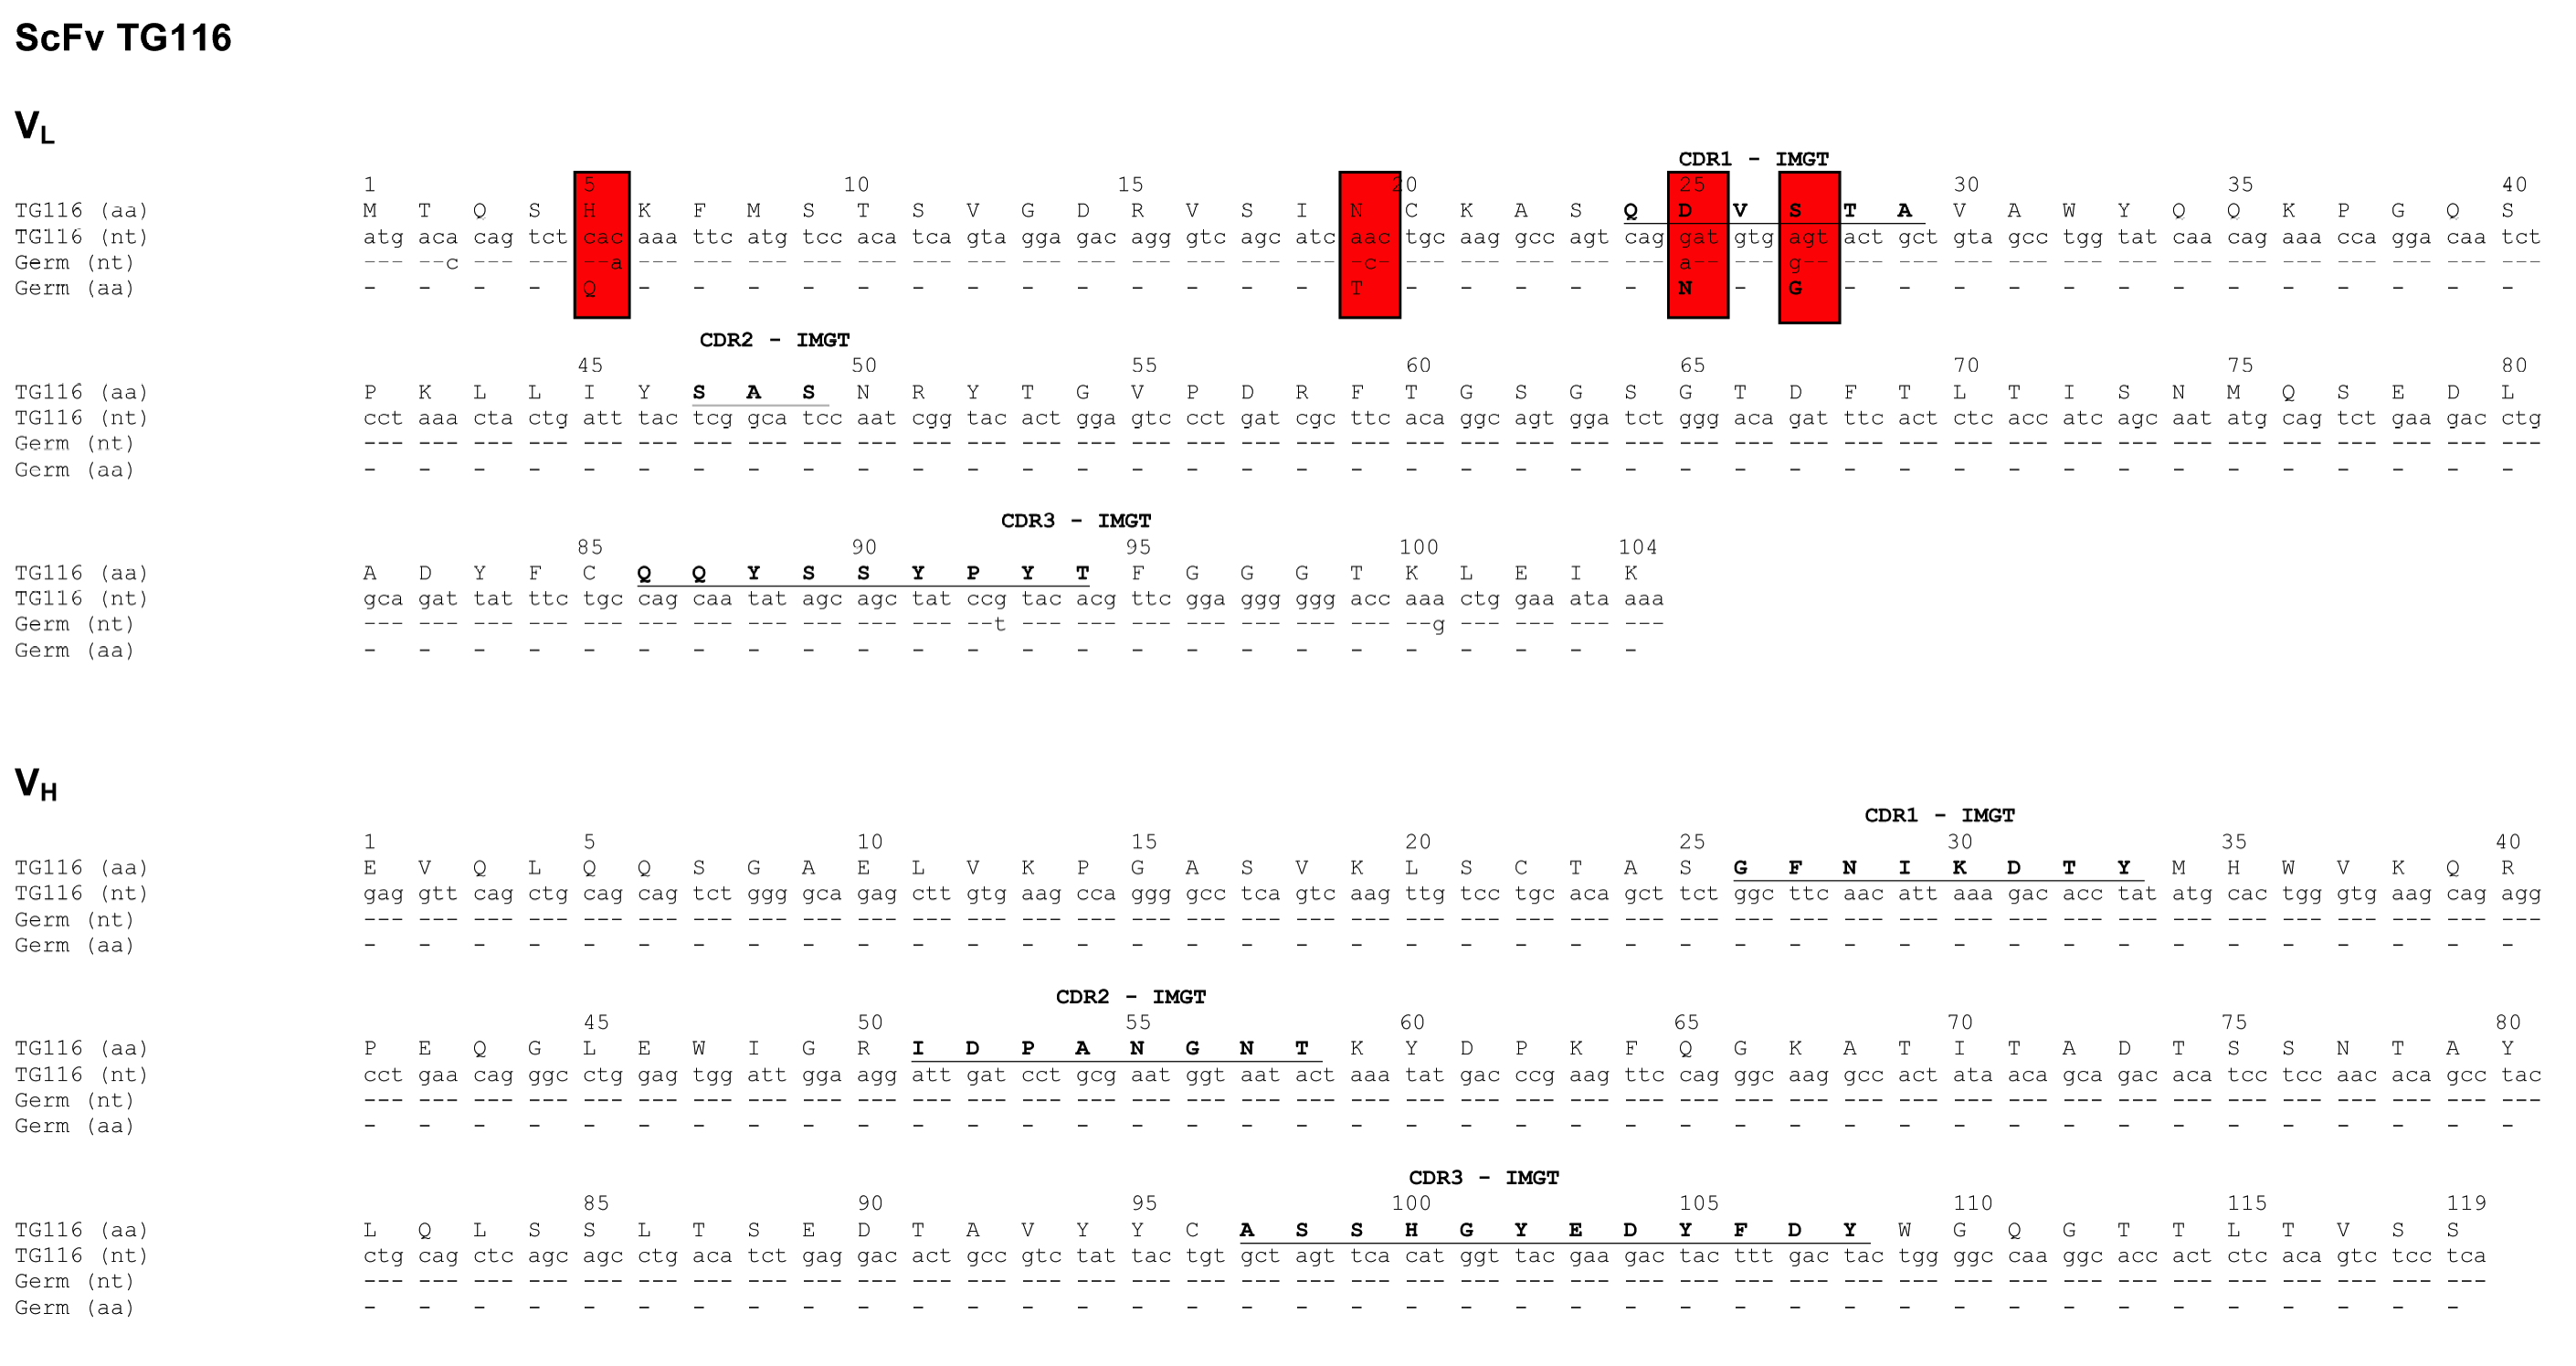


**Supplementary Figure S8: (continuous).**


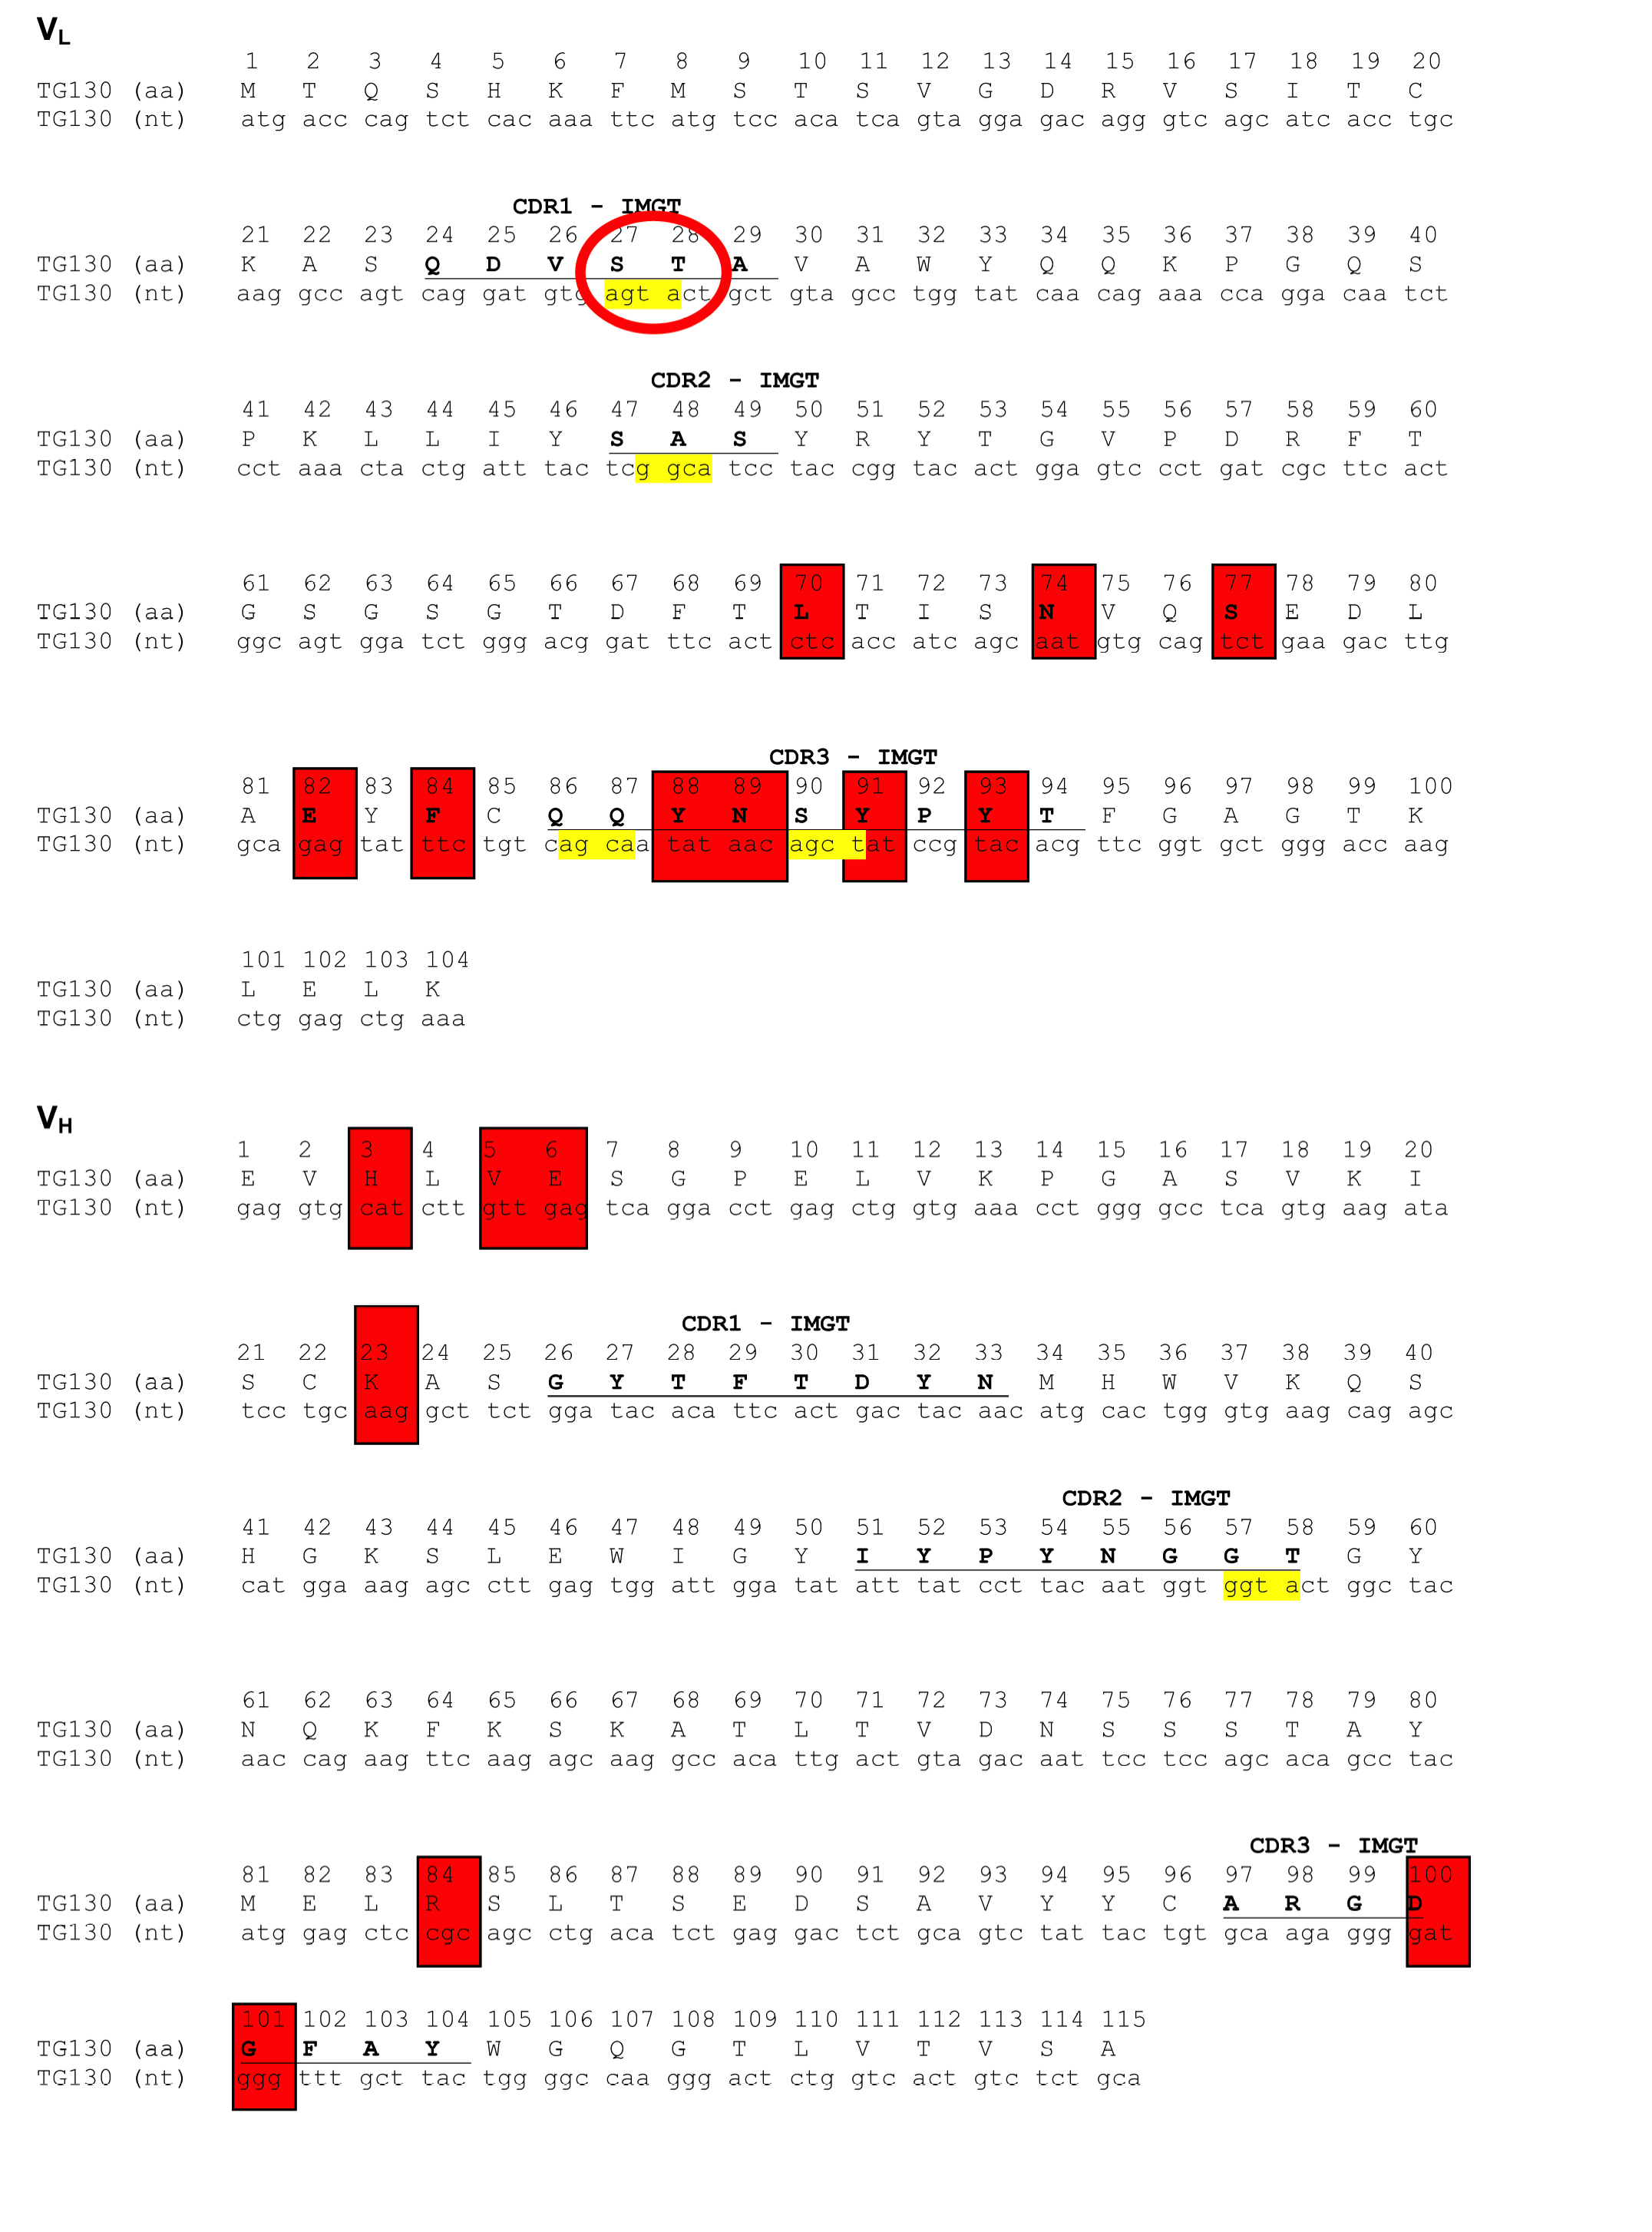


**Supplementary Figure S9: Alignment of nucleotide and amino acid sequences of variable regions of scFv TG130 and targeted affinity mutagenesis.** Regions mutated from germline origin sequences are boxed in red, and RGYW-motif hotspots are highlighted in yellow. The targeted hotspot mutagenesis is circled in red.
